# Supplementary material for: Templating an N-heterocyclic carbene (NHC)-cyclometalated Cp*IrIII-based oxidation precatalyst on a pendant coordination platform: assessment of the oxidative behavior via electrochemical, spectroscopic and catalytic probes
Source: Royal Society of Chemistry journal article supplement (doi:10.1039/c4dt03161j), 2014-11-07
Supplement: c4dt03161j1.pdf [file c4dt03161j1.pdf]

## **Electronic Supplementary Information (ESI)**

### **Templating an N-Heterocyclic Carbene (NHC)-Cyclometalated Cp\*Ir<sup>III</sup>-Based Oxidation Precatalyst on a Pendant Coordination Platform: Assessment of the Oxidative Behavior via Electrochemical, Spectroscopic and Catalytic Probes**

Suraj K. Gupta, and Joyanta Choudhury\*

Organometallics & Smart Materials Laboratory, Department of Chemistry, Indian Institute of Science Education and Research Bhopal, Bhauri, Indore By-pass Road, Bhopal 462 066, INDIA.

E-mail: joyanta@iiserb.ac.in.

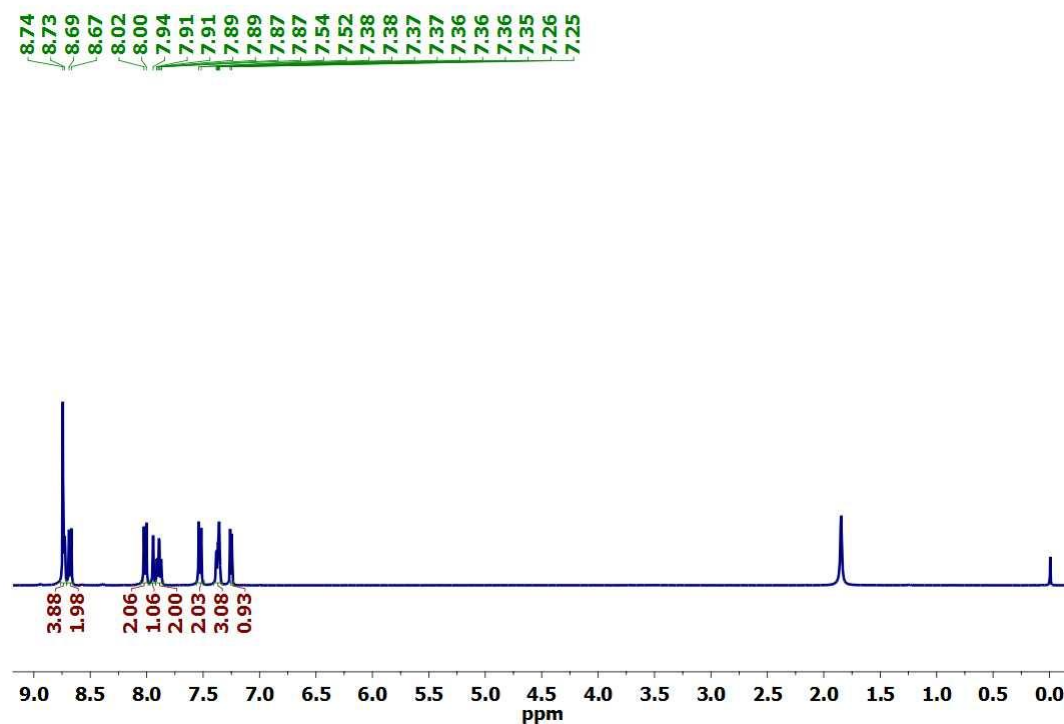

**Figure S1** <sup>1</sup>H NMR spectrum of 4'-[4-(Imidazol-1-yl)phenyl]-2,2':6',2''-terpyridine (400 MHz, CDCl<sub>3</sub>, 300 K).

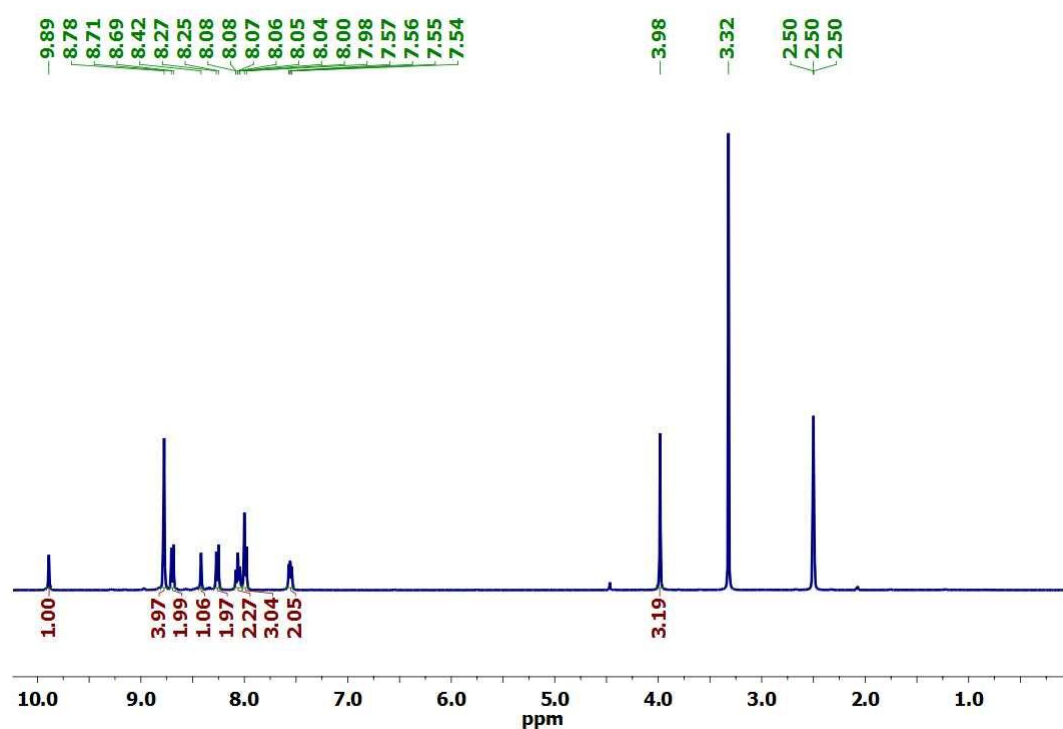

**Figure S2** <sup>1</sup>H NMR spectrum of [L<sup>1</sup>H]<sup>+</sup>I<sup>-</sup> (400 MHz, DMSO-*d*<sub>6</sub>, 300 K).

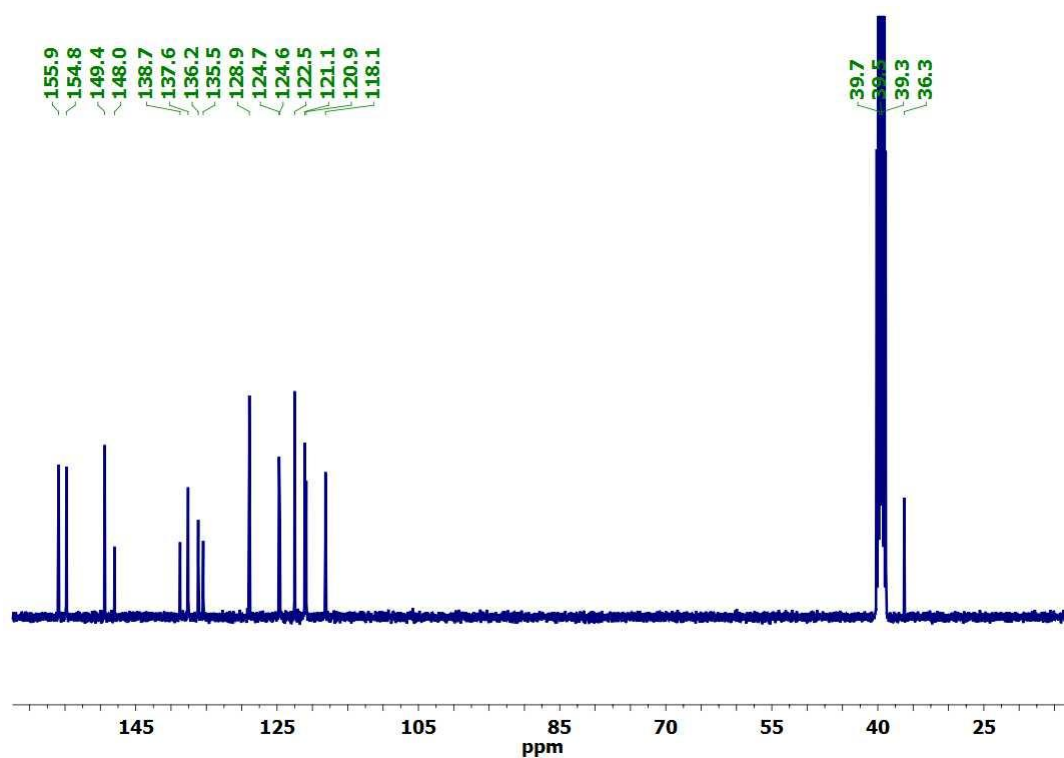

**Figure S3**  $^{13}\text{C}\{^1\text{H}\}$  NMR spectrum of  $[\text{L}^1\text{H}]^+\text{T}^-$  (100 MHz,  $\text{DMSO-}d_6$ , 300 K).

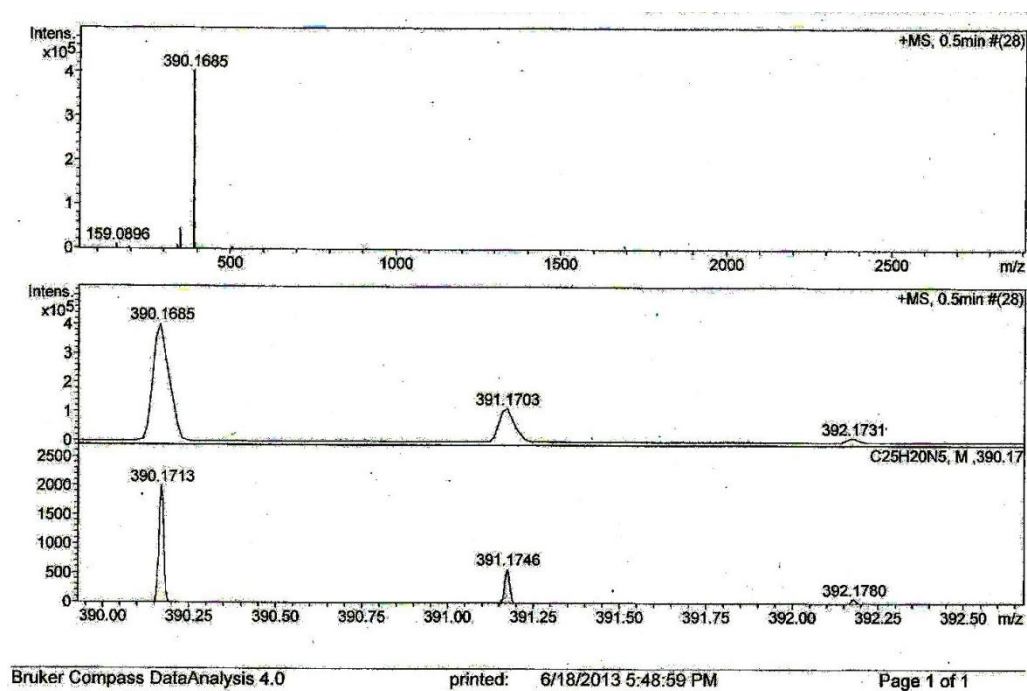

**Figure S4** ESI-MS (positive ion mode) spectrum of  $[\text{L}^1\text{H}]^+\text{T}^-$ .

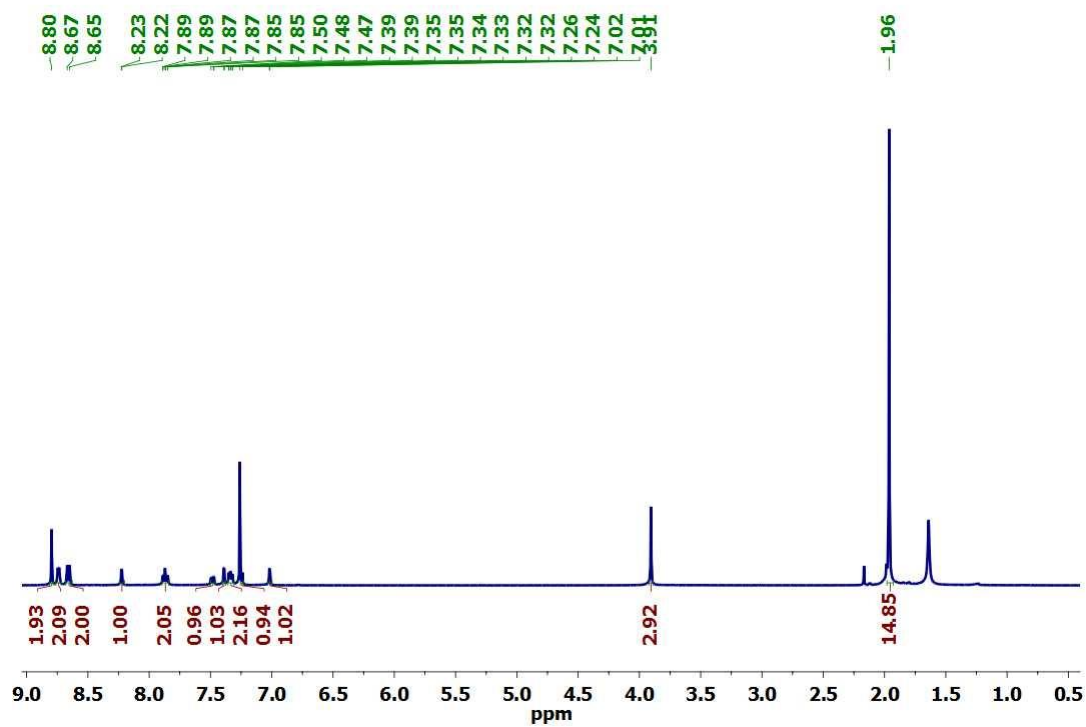

**Figure S5** <sup>1</sup>H NMR spectrum of **1** (400 MHz, CDCl<sub>3</sub>, 300 K).

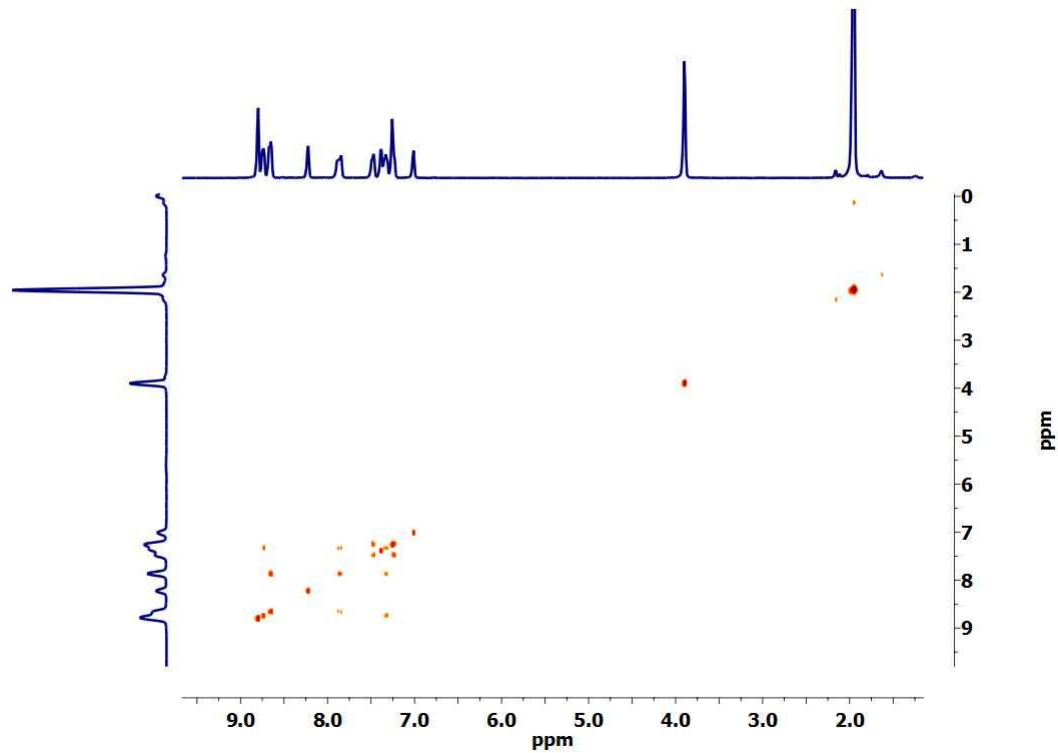

**Figure S6** <sup>1</sup>H-<sup>1</sup>H COSY NMR spectrum of **1**.

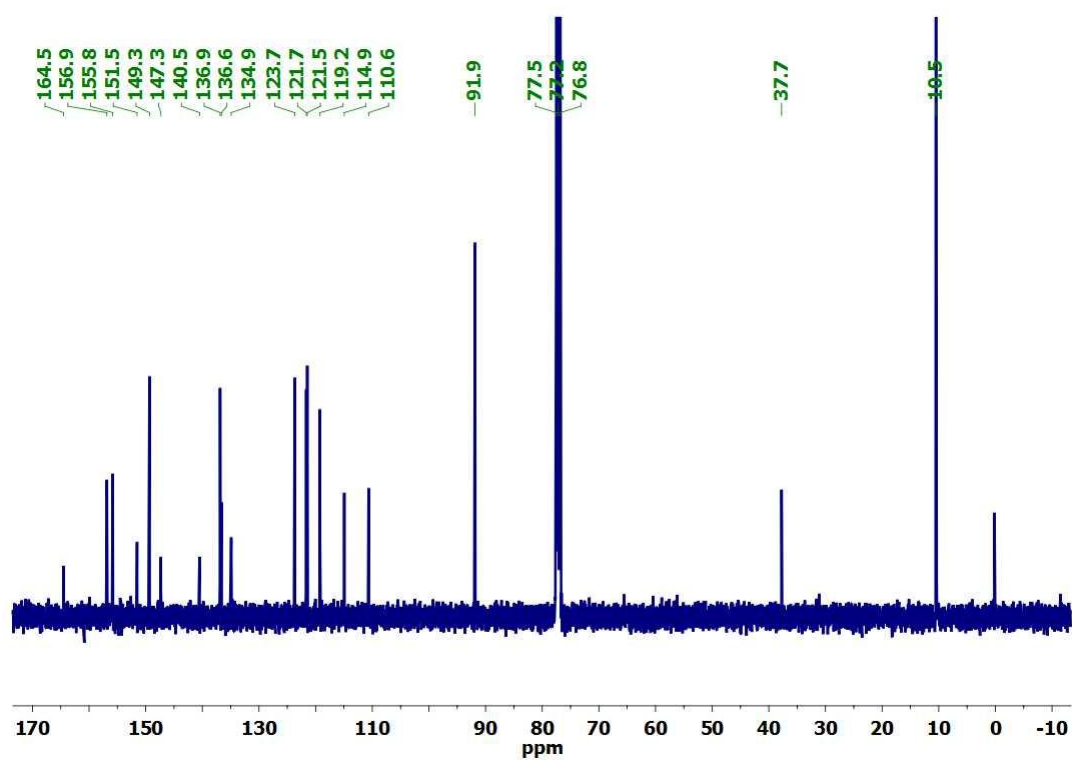

**Figure S7**  $^{13}\text{C}\{^1\text{H}\}$  NMR spectrum of **1** (100 MHz,  $\text{CDCl}_3$ , 300 K).

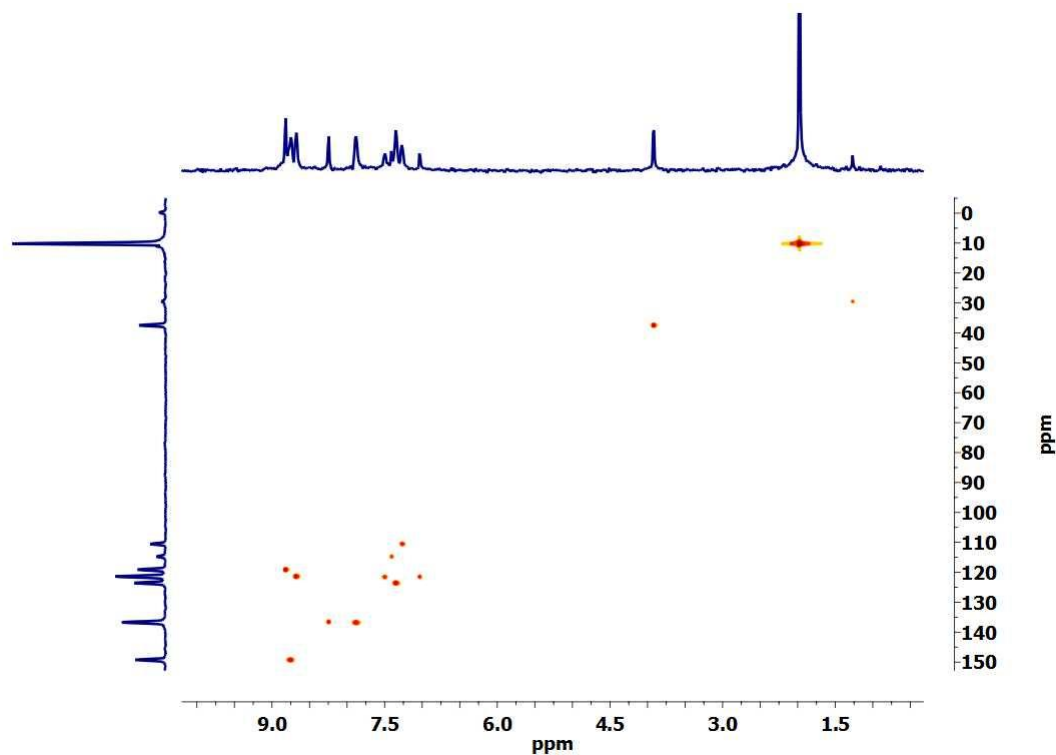

**Figure S8**  $^1\text{H}$ - $^{13}\text{C}$  HSQC NMR spectrum of **1**.

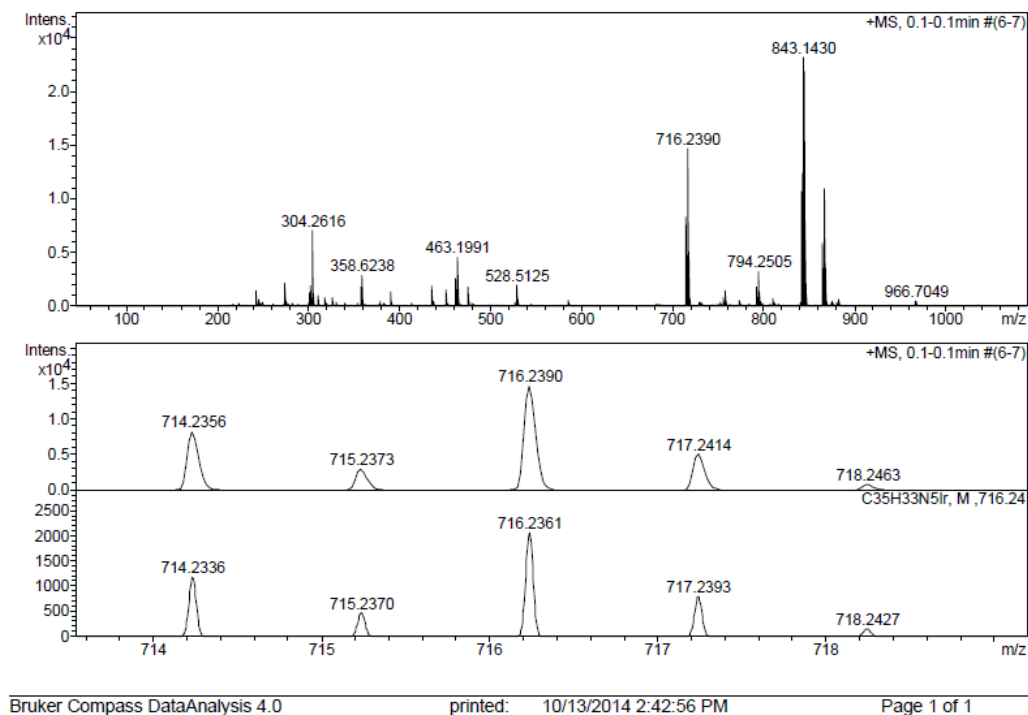

**Figure S9a** ESI-MS (positive ion mode) spectrum of **1**. The peak at 716.2390 is due to the  $[1-I]^+$  cation.

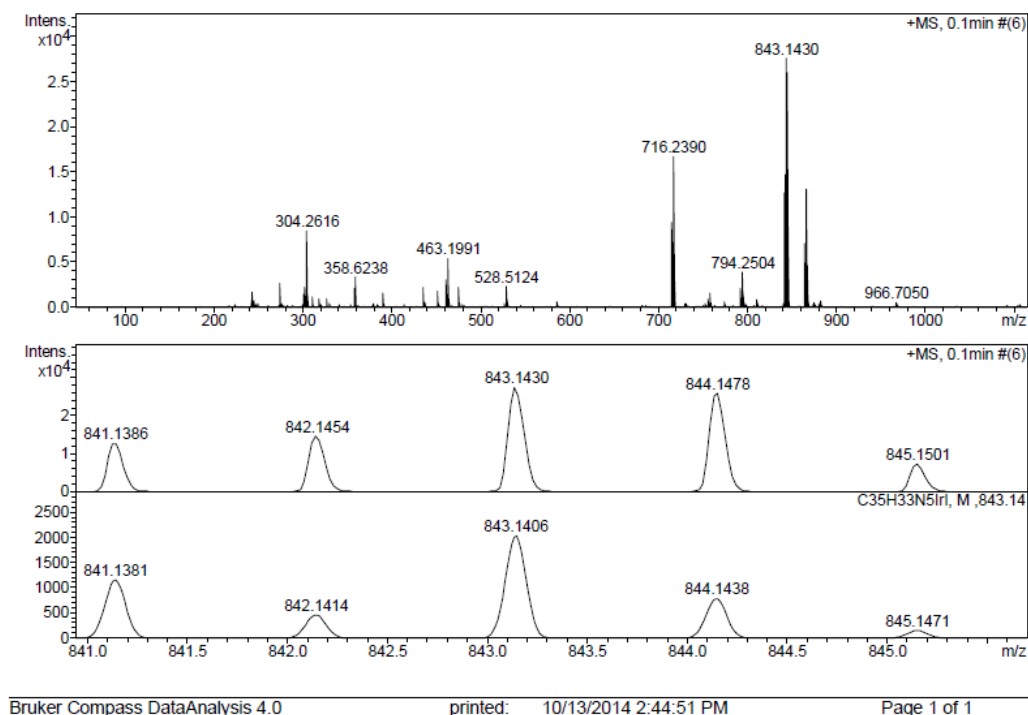

**Figure S9b** ESI-MS (positive ion mode) spectrum of **1**. The peak at 843.1430 corresponds to the complex **1** which might be due to oxidation under ESI-MS conditions.

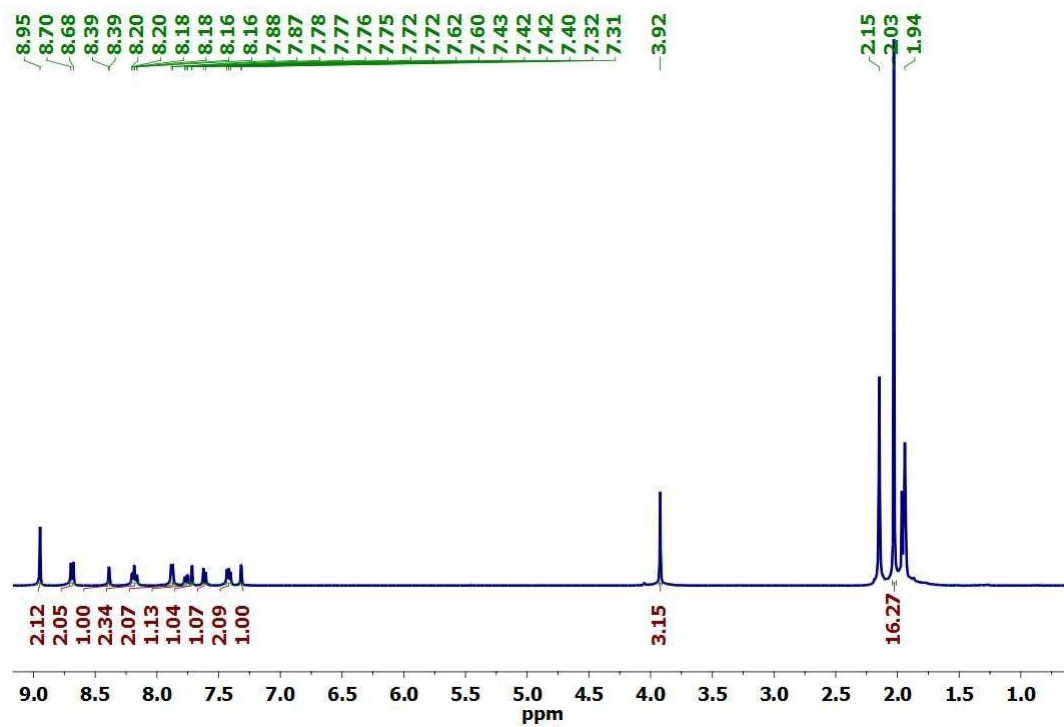

**Figure S10**  $^1\text{H}$  NMR spectrum of **2** (400 MHz,  $\text{CD}_3\text{CN}$ , 300 K).

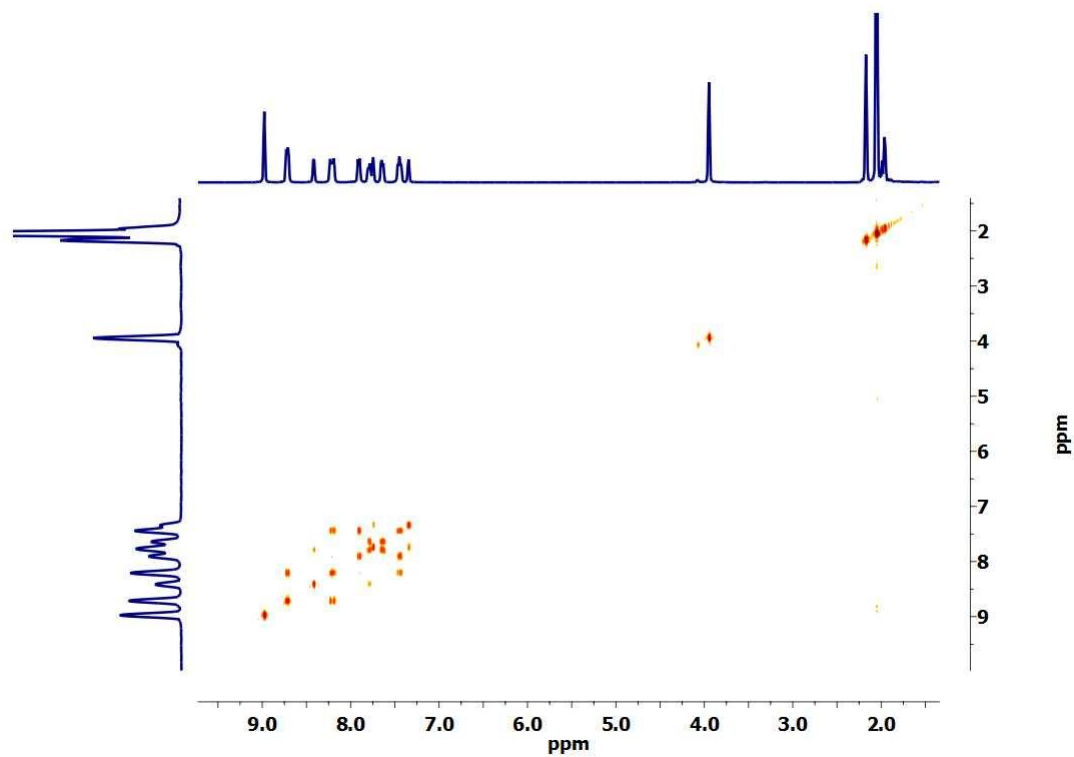

**Figure S11**  $^1\text{H}$ - $^1\text{H}$  COSY NMR spectrum of **2**.

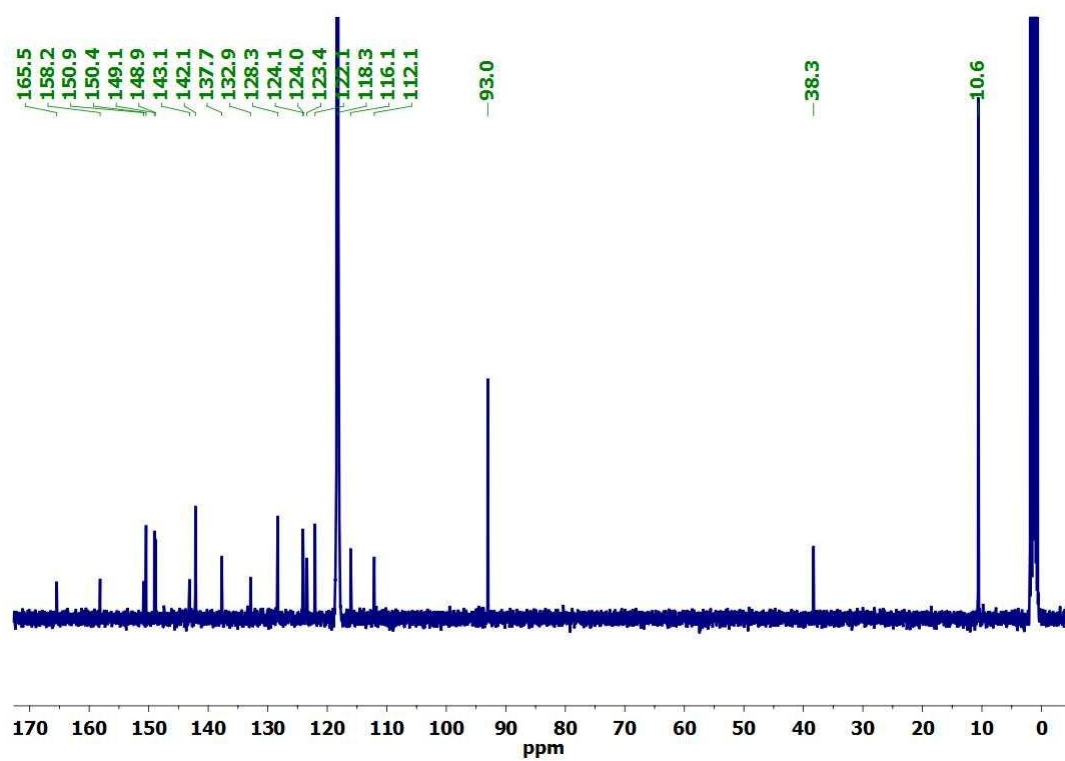

**Figure S12**  $^{13}\text{C}\{^1\text{H}\}$  NMR spectrum of **2** (100 MHz,  $\text{CD}_3\text{CN}$ , 300 K).

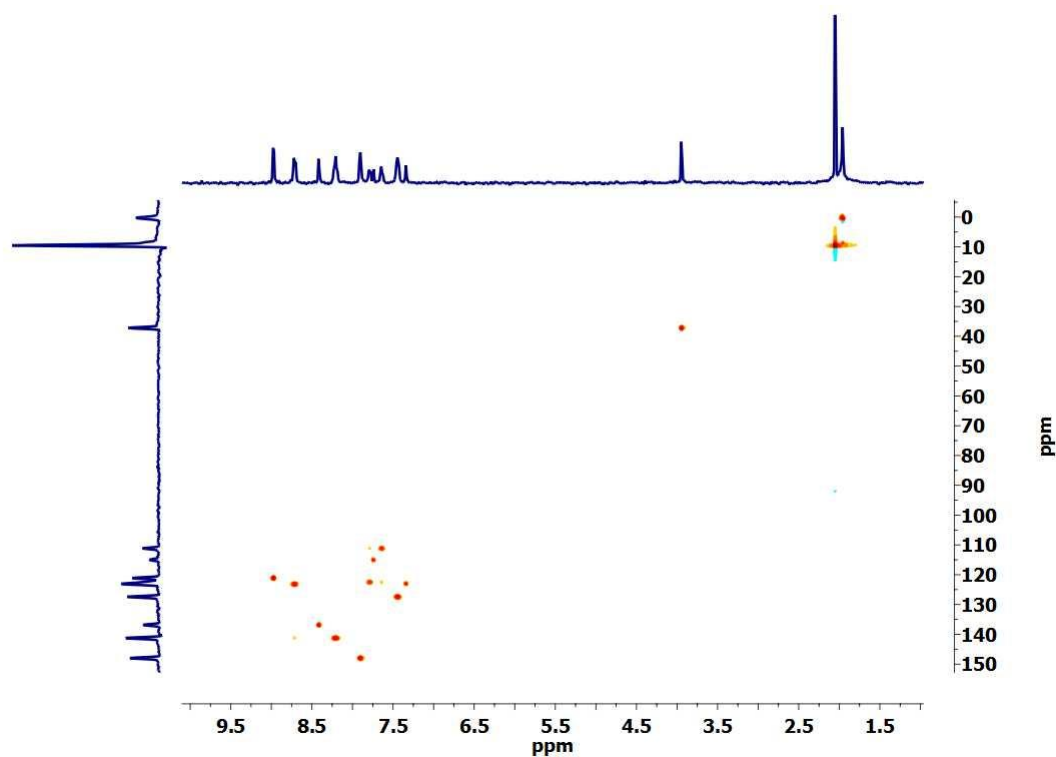

**Figure S13**  $^1\text{H}$ - $^{13}\text{C}$  HSQC NMR spectrum of **2**.

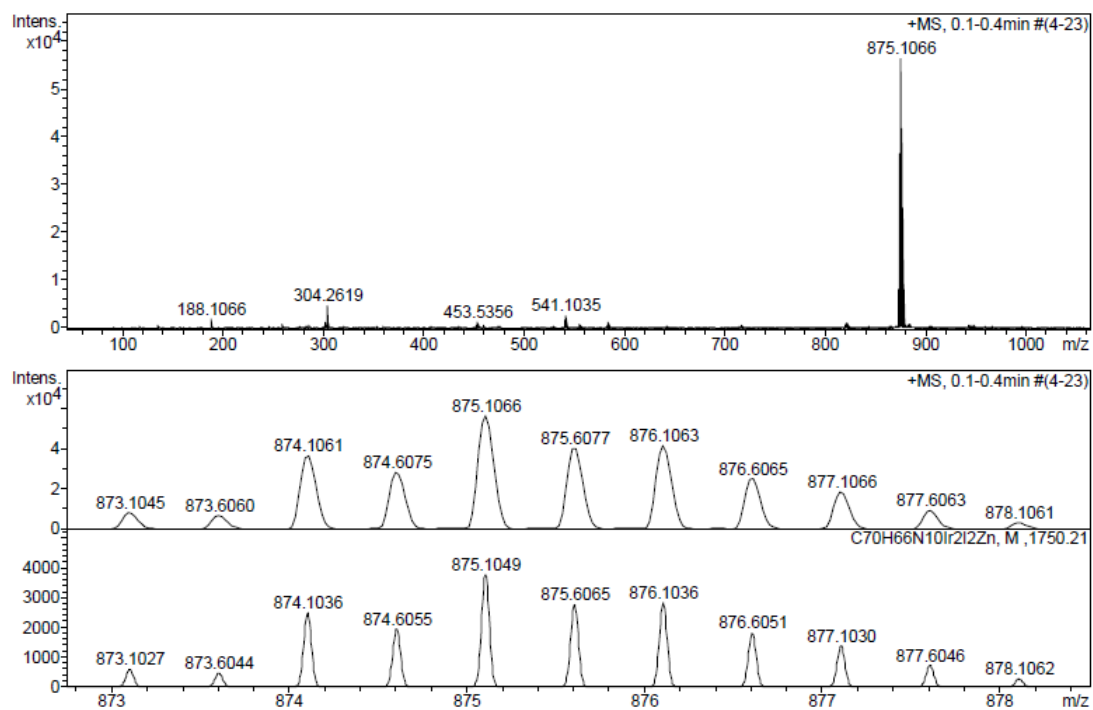

**Figure S14** ESI-MS (positive ion mode) spectrum of **2**. The peak at 875.1066 corresponds to the  $[\text{Zn}(\mathbf{1})_2]^{2+}$  cation.
